# Supplementary material for: A Puccinia striiformis f. sp. tritici secreted protein activates plant immunity at the cell surface
Source: PubMed Central journal article supplement (PMC5430700; doi:10.1038/s41598-017-01100-z), 2017-04-25
Supplement: 41598_2017_1100_MOESM1_ESM.pdf [file 41598_2017_1100_MOESM1_ESM.pdf]

***A Puccinia striiformis* f. sp. *tritici* secreted protein  
activates plant immunity at the cell surface**

**Bayantes Dagvadorj, Ahmet Caglar Ozketen, Ayse Andac, Cian Duggan, Tolga  
Osman Bozkurt, and Mahinur S. Akkaya**

**a**

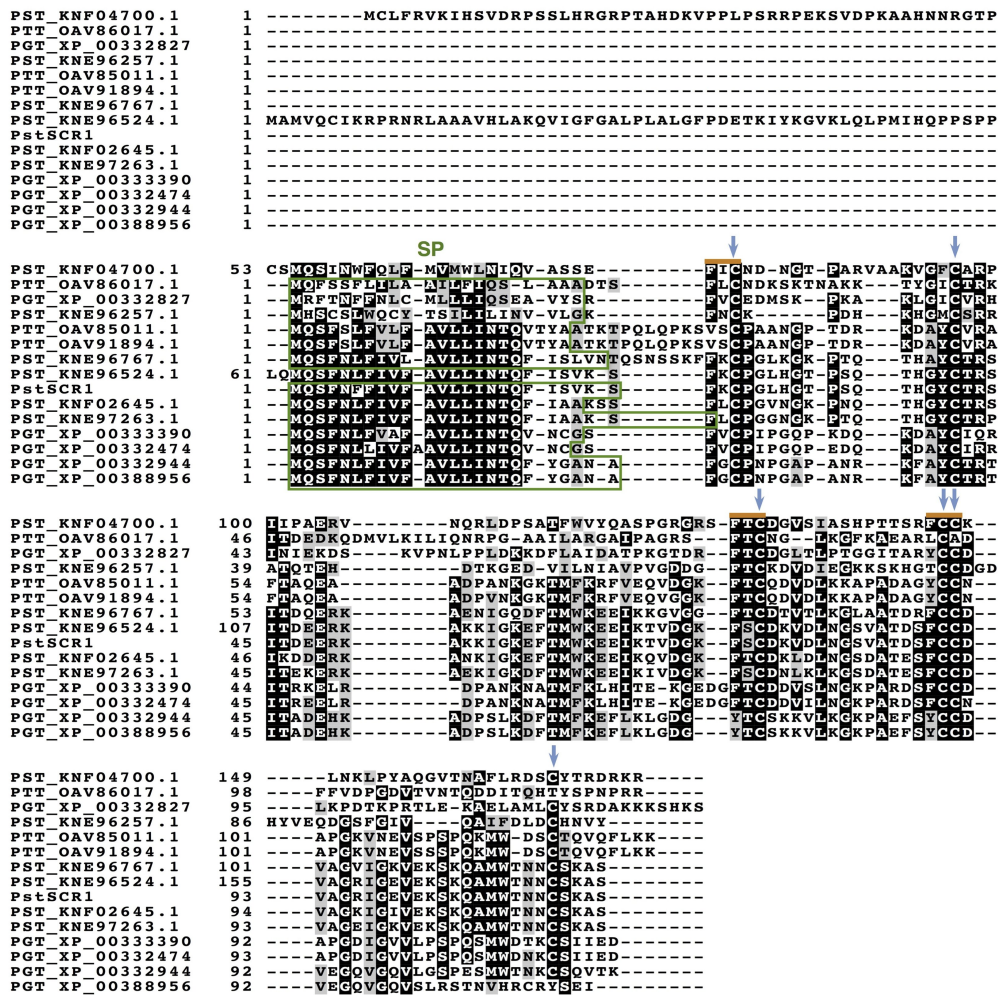

**b**

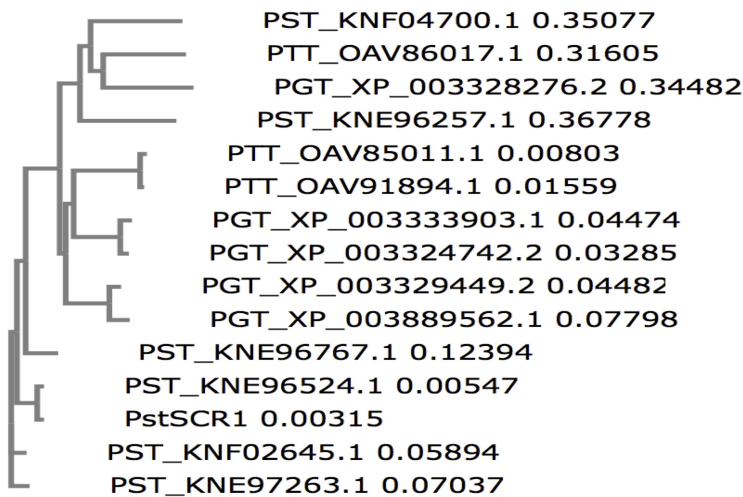

**Figure S1. The Multiple sequence alignment and the phylogeny tree of PstSCR1 homolog proteins. a)** Alignment was obtained using MUSCLE and displayed by BoxShade 3.21. Black letters represent identical amino acids. The predicted signal peptide (SP) sequences of PstSCR1 and its homolog proteins in green boxes. SP was not predicted in PST\_KNF04700.1 and PST\_KNE96524.1 due to extended N-termini. (Y/F/W)x~~C~~ motifs and C residues are indicated with orange and blue arrows, respectively. **b)** The Phylogeny tree was constructed with Neighbour Joining without distance corrections.

PstSCR1-SP-5-UTR-F

gggcaggtacaacaacttttccaaccactcctcaaaaattaaattcacat **tatttgtttagaattacac**

**aagATG**CAAAGCTTCAACTTCTTCATCGTATTCGCAGTGTGTTGATCAACACTCAATTCATTTCTGTG

AAGTCGTTCAAGTGTCCTCGTTTGCATGGAACGCCAAGCCAAACACATGGTTATTGCACCAGATCAATC

ACCGATGAAGAACGAAAGGCAAAAAAGATTGGCAAGGAGTTCACCATGTGGA ★ AGGAAGAAATCAAGA

CAGTCGACGGGAAATTCCTCGTGTGATAAAGTGGACTTGAATGGGTCGGTTGCCACAGATAGCTTCTGTT

GTGACGTTGCAGGTAGAATTGGTGAA ★ GTTGAGAAAAGTAAACAAGCTATGTGG**ACAACA**ACTGCTC

**CAAAGCATCTTAC**ggaataccaacattaccttgctctgaggctggcccatgtcttcaaattcgacc

PstSCR1-Rev

**Figure S2. PCR primer design strategy to detect the presence of PstSCR1 expression in *Pst* infected wheat samples.** PstSCR1 EST sequence; arrows indicate primers annealing regions and expected amplification size is 375 bp. Stars indicate the exon joints. The forward primer of PstSCR1 was designed to amplify the 5' UTR region of the PstSCR1, which is predicted as the intron region in the closest homolog of PstSCR1.

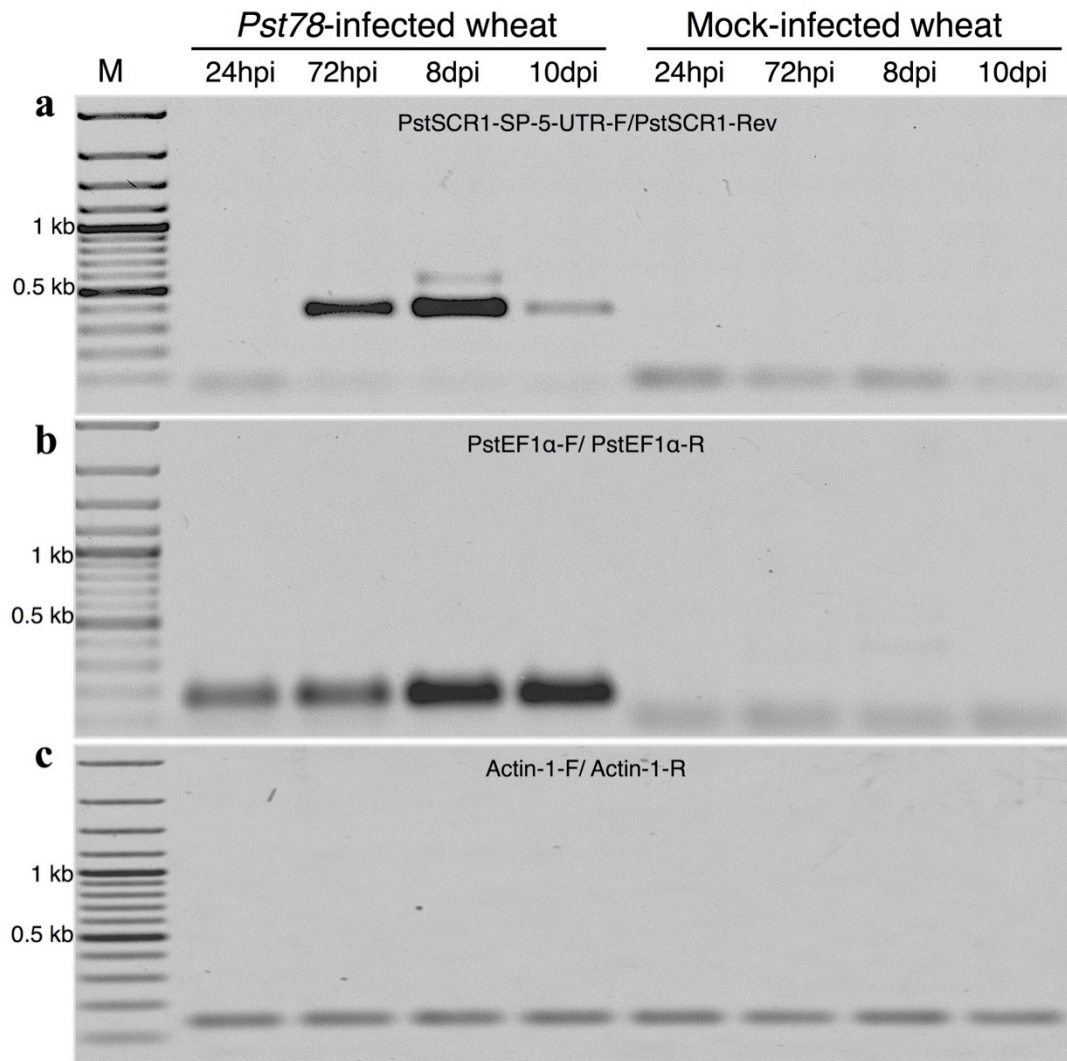

**Figure S3. The PstSCR1 gene expression profile during *Pst-78* infection in wheat.** **a**, **b** and **c** are PstSCR1 (exp: 375 bp), *Pst* Elongation factor 1 alpha (*PstEF1α*)<sup>1</sup>, and wheat *Actin-1*<sup>2</sup> genes amplifications, respectively. qPCR products of 10 μL were loaded on 1% agarose gel. **M**: 100 bp ladder (Fermentas SM#0321).

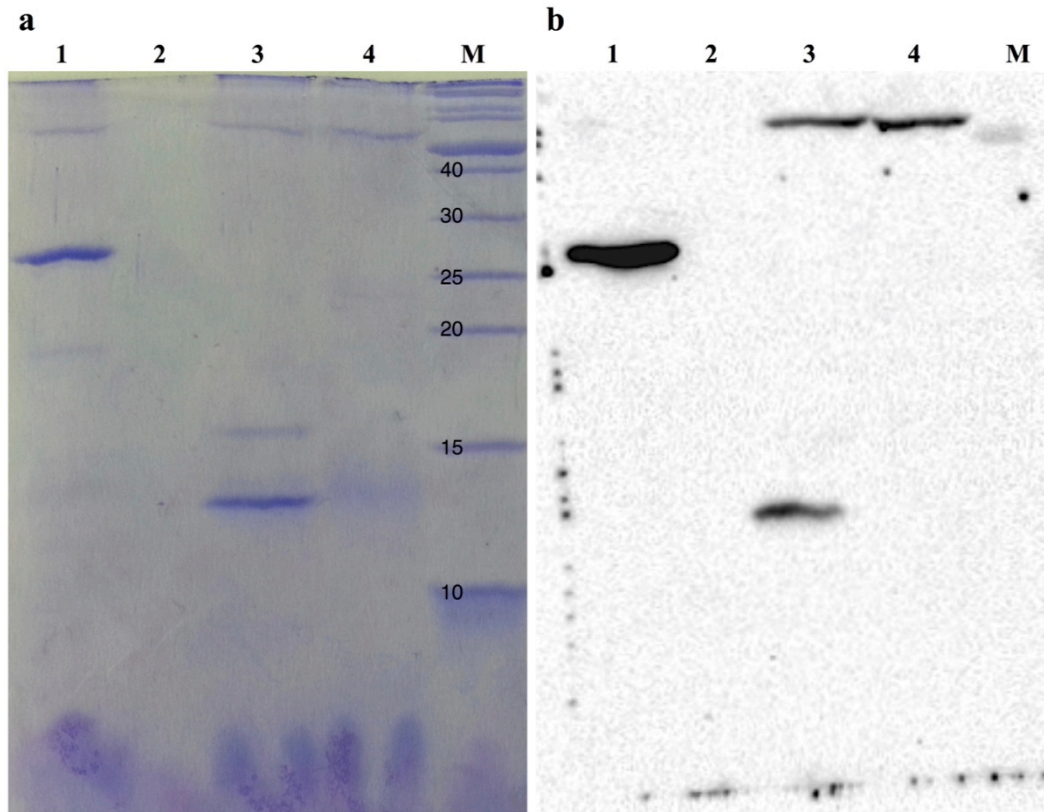

**Figure S4. The PstSCR1 was purified by immunoprecipitation *in planta*.** a) Anti-FLAG immunoprecipitation samples separated with SDS-PAGE (12 %) and stained with Coomassie Blue b) Immunoblot with Anti-FLAG antibody **1)** pTRBO/FLAG-RFP, **2)** No load **3)** pTRBO/PstSCR1-FLAG, **4)** pTRBO/ $\Delta$ SP-PstSCR1-FLAG, and **M)** Protein marker (Pierce #PI-26614).



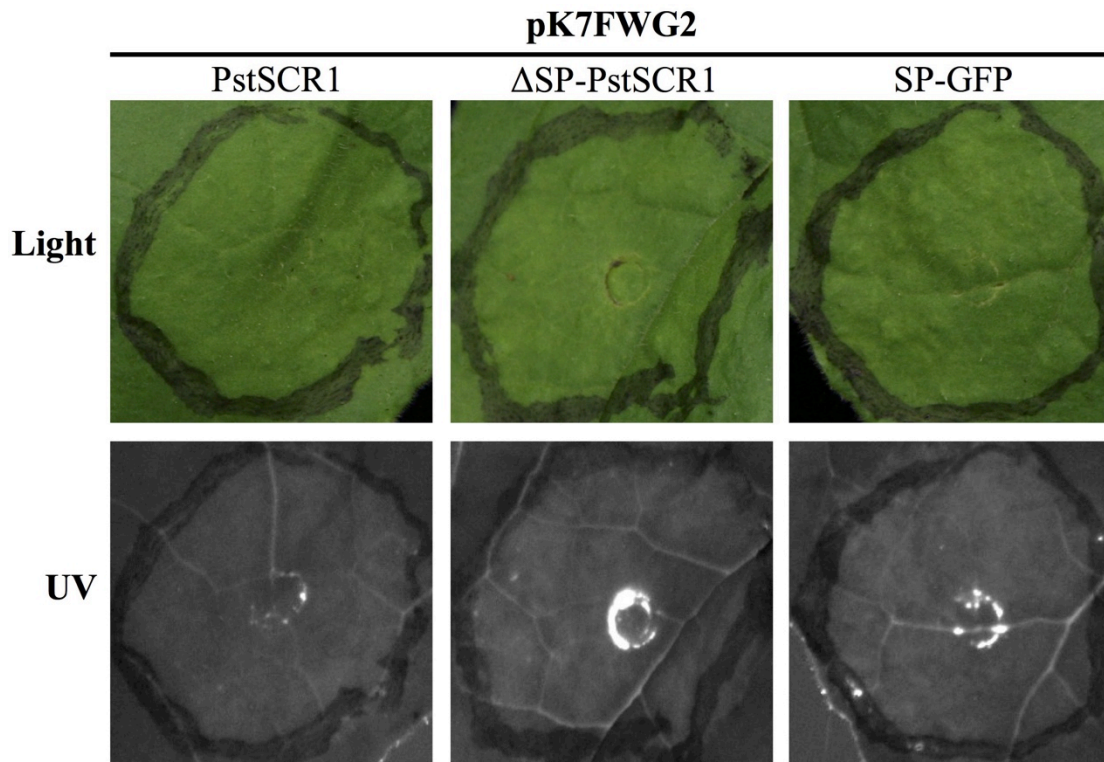

**Figure S5. PstSCR1 does not induce cell death in *N. benthamiana* when expressed with pK7FWG2.** A representative of six biological replicates: agroinfiltrated spots of *N. benthamiana* leaf expressing pK7FWG2/PstSCR1, pK7FWG2/ $\Delta$ SP-PstSCR1 and pK7FWG2/SP-GFP, 4-dpai.

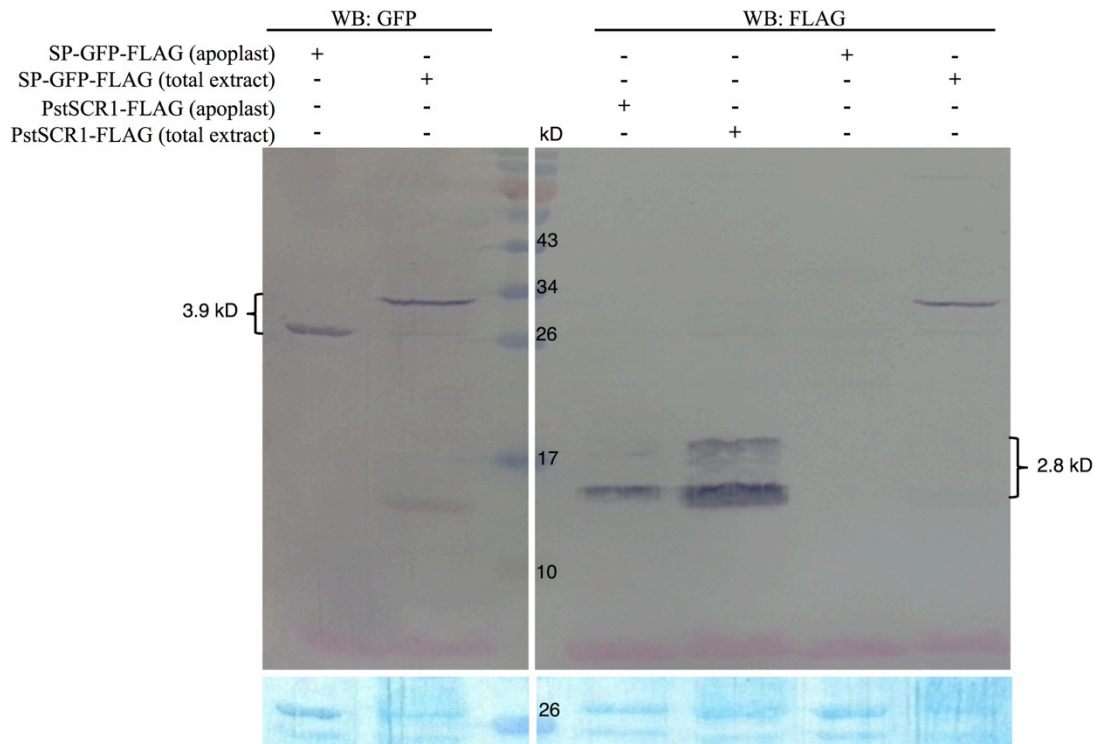

**Figure S6. Immunoblot analysis of PstSCR1 fused with FLAG tag transiently expressed in *N. benthamiana*.** Apoplastic fluid and total protein extract, from leaves after removal of apoplastic fluid, (10  $\mu$ L) were loaded on SDS-PAGE gel and Western blotting was carried out with Anti-FLAG (Thermo) or Anti-GFP (Thermo) antibodies; total protein was detected by Reversible Protein Stain on PVDF membrane (Thermo). As a control, SP-GFP-FLAG was used. The theoretical sizes of the bands; SP-GFP-FLAG is 33.2 kD; SP-GFP-FLAG (SP and FLAG cleaved) is 29.4kD; PstSCR1-FLAG is 14.74 kD and  $\Delta$ SP-PstSCR1-FLAG is 11.96kD.

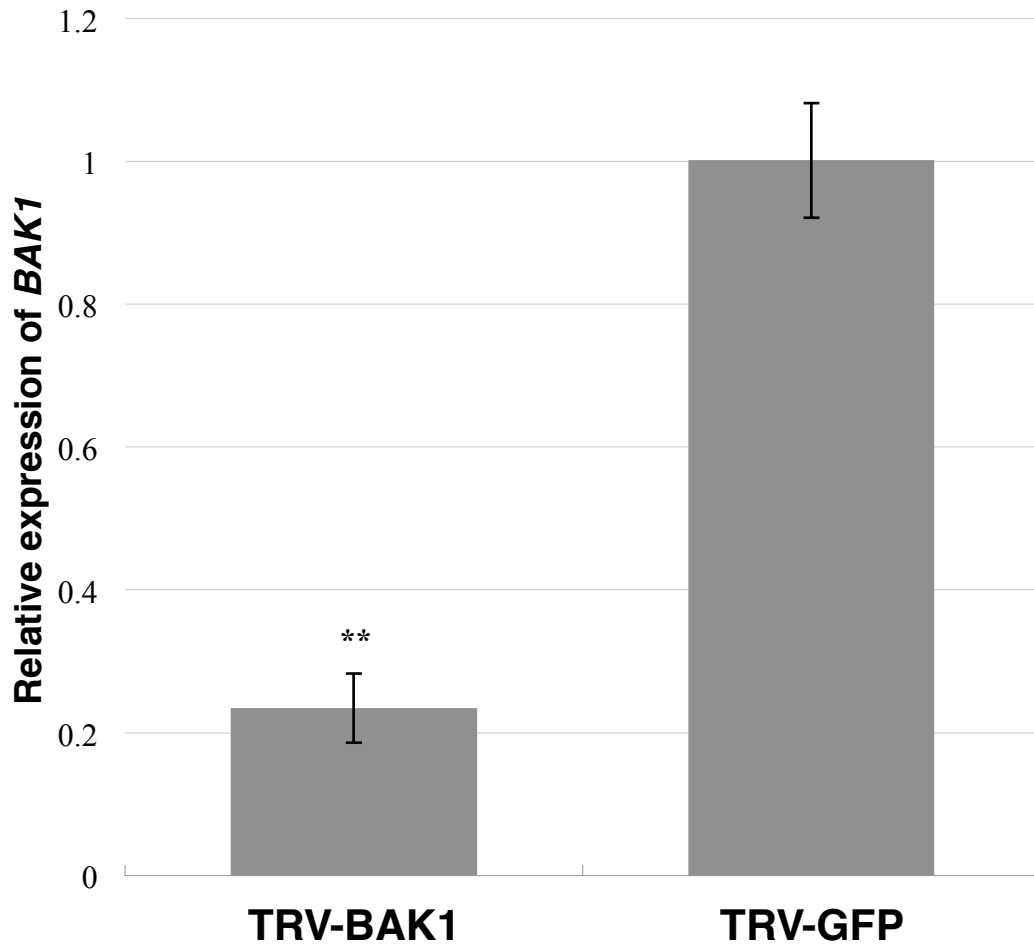

**Figure S7. *NbBAK1* expression level determined after VIGS by qPCR.** In *N. benthamiana* plant leaves, *NbBAK1* was silenced using TRV-BAK1 construct and TRV-GFP construct was used as a control for silencing<sup>3</sup>. The expression levels of *NbBAK1* were determined by qPCR in both plant sets. *EF1a* was used as an endogenous gene control. Relative expression levels were analysed by  $2^{-\Delta\Delta Ct}$  method<sup>4</sup>. Means and standard deviations from biological replicates are illustrated. Asterisks indicate significant differences by ttest (\*\* $P \leq 0.01$ ).



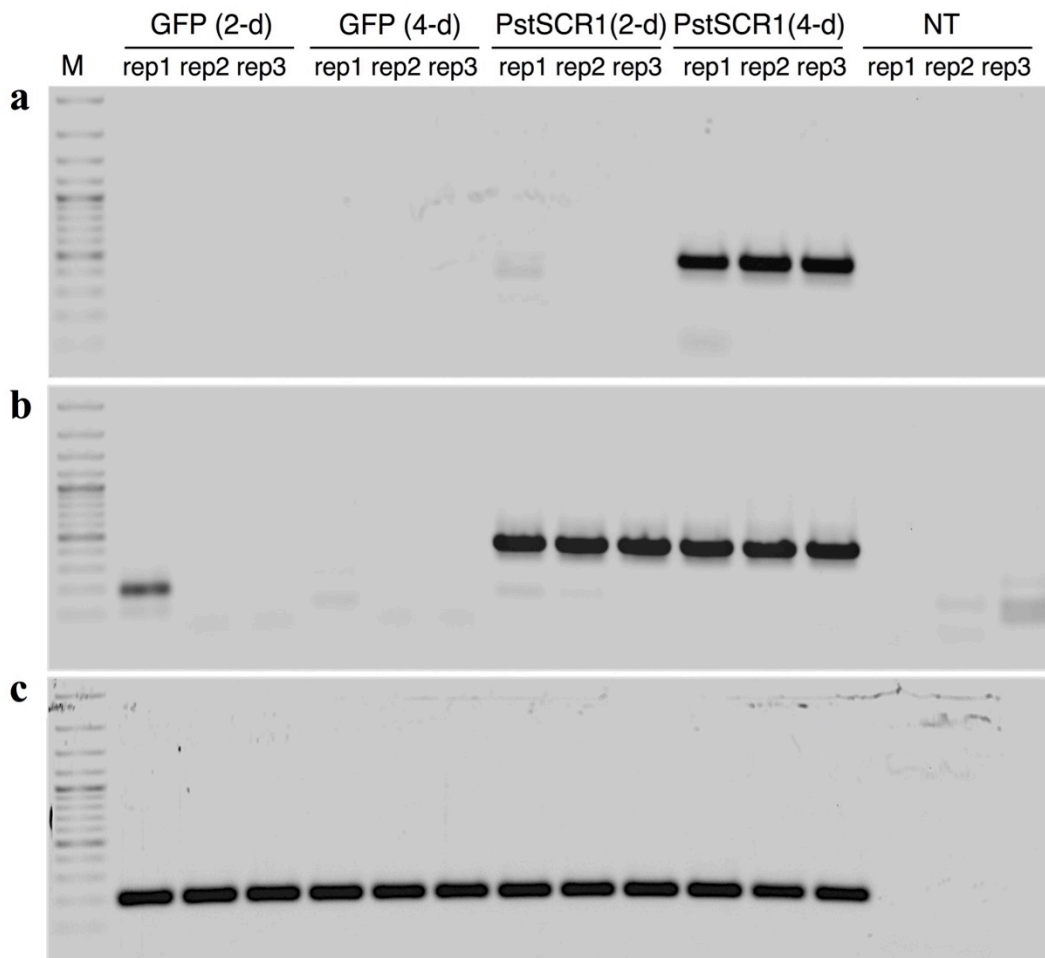

**Figure S8. The PstSCR1 treated plants analysed by qPCR show defence related gene activation.** Total RNA was isolated 2- and 4-d after purified PstSCR1 protein infiltration. The synthesized cDNAs were subjected to PCR using **a)** *NbCYP71D20*, **b)** *NbACRE31* or **c)** housekeeping *EFl $\alpha$*  gene specific primers and visualized in an agarose gel. **M:** 100 bp ladder (Fermentas SM#0321) and **NT:** no template PCRs.

| Primer names          | Sequence 5' to 3'                                  | Length (bp) |
|-----------------------|----------------------------------------------------|-------------|
| PstSCR1-SP-5-UTR-F    | tattgttagaattacacaagatg                            | 25          |
| PstSCR1-Rev           | ctaagatgctttggagcagttgtt                           | 27          |
| PstEF1 $\alpha$ -F    | ttcgccgtccgtgatagagaaa                             | 24          |
| PstEF1 $\alpha$ -R    | atgcgtatcatggtggaggatga                            | 24          |
| Actin-1-F             | aatggtcaaggctggttcgc                               | 21          |
| Actin-1-R             | ctgcccctcatcaccaacata                              | 21          |
| CACC-SP               | caccatgcaaagcttcaacttctcatcg                       | 29          |
| CACC-ATG-SCR1         | caccatgtcaagtgctcccgtttgcat                        | 28          |
| SCR1-noSTP            | agatgctttggagcagttgtt                              | 24          |
| SP-noSTP              | cgacttcacagaaatgaattgag                            | 23          |
| PacI-SP-fw            | gggttaattaatgcaaagcttcaacttctcatcgattcgcag         | 45          |
| PacI-noSP-SCR1-fw     | gagtttaattaatgctcaagtgctcccgtttgcatgg              | 37          |
| SCR1C-FLAGRev2        | cctttagtcggaattctcgagaagcttgacagatgctttggagcagttgt | 51          |
| SCR1C-FLAGRev1        | attcgccgcctatttgcctcgtcctttagtcggaattctcgaga       | 51          |
| GFP-FLAG-Rev          | cctttagtcggaattctcgagaagcttgaccttgacagctcgtccatgcc | 52          |
| NbSerk3-qRT-F         | gcttctgaggctgaataata                               | 21          |
| NbSerk3-qRT-R         | gaagaagaagatgagggtgtag                             | 22          |
| NbEF1 $\alpha$ -qRT-F | ctacctcaagaaggttgatac                              | 22          |
| NbEF1 $\alpha$ -qRT-R | aacatcctgaagtggaagac                               | 20          |
| NbCYP71D20-F          | accgcaccatgctcttagag                               | 20          |
| NbCYP71D20-R          | cttgcaccttgagtactgc                                | 20          |
| NbACRE31-F            | cgtcttcgtcggatcttcg                                | 19          |
| NbACRE31-R            | ggccatcgtgatcttggtc                                | 19          |

**Table S1. Primers used for cloning and qPCR.**

## References

1. Yin, C. *et al.* Generation and analysis of expression sequence tags from haustoria of the wheat stripe rust fungus *Puccinia striiformis* f. sp. *Tritici*. *BMC Genomics* **10**, 626 (2009).
2. Bozkurt, O. Determination of Genes Involved in the Yellow Rust. (Middle East Technical University, 2007). <http://etd.lib.metu.edu.tr/upload/12608246/index.pdf>
3. Chaparro-Garcia, A. *et al.* The receptor-like kinase serk3/bak1 is required for basal resistance against the late blight pathogen *Phytophthora infestans* in *Nicotiana benthamiana*. *PLoS One* **6**, e16608 (2011).
4. Livak, K. J. & Schmittgen, T. D. Analysis of relative gene expression data using real-time quantitative PCR and the  $2^{-\Delta\Delta CT}$  Method. *Methods* **25**, 402–408 (2001).
